# Supplementary figures and images for: Expression of IL-33 and its epigenetic regulation in multiple sclerosis
Source: PubMed Central journal article supplement — Ann Clin Transl Neurol. 2014 Mar 29;1(5):307–18. doi: 10.1002/acn3.47 (PMC4157667; doi:10.1002/acn3.47), 2014-03-29

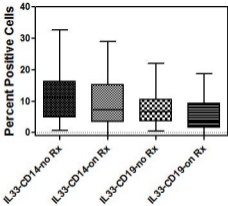

Supp Figure 1

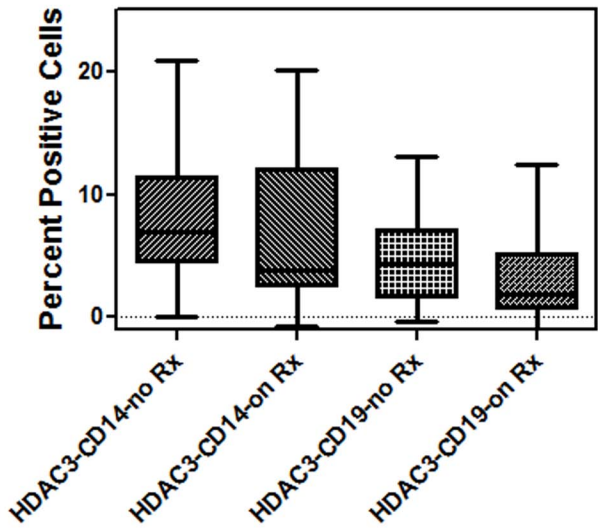

a

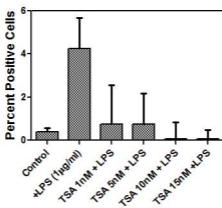

b

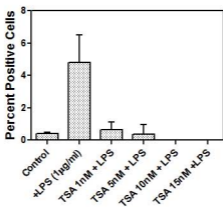

c

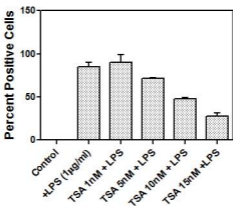

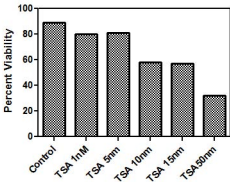

Supp Figure 4

Supplement: NIHMS621207-supplement-Supp_FigureS1-S4.pdf [file NIHMS621207-supplement-Supp_FigureS1-S4.pdf]
